# Supplementary material
Source: Royal Society of Chemistry journal article supplement (doi:10.1039/d6cc00877a)
Supplement: d6cc00877a1.pdf [file d6cc00877a1.pdf]

**Supplementary Information for:**

**Photoresponsive ionic Hydrogen-Bonded Organic Framework  
exhibiting pyridine protonation effects achieve room-  
temperature phosphorescence through polymer doping**

Jia-Yu Wang, Bin Zhou and Li-Hui Cao\*

<sup>a</sup>Shaanxi Key Laboratory of Chemical Additives for Industry, College of Chemistry and Chemical Engineering, Shaanxi University of Science and Technology, Xi'an, 710021, P. R. China

E-mail: [caolihui@sust.edu.cn](mailto:caolihui@sust.edu.cn)

## Materials methods and experimental details

### Materials and reagents.

All reagents and solvents, including 1,3,5-triphenylbenzene, tris(4-pyridyl) amine (TPA), polyvinyl alcohol (PVA), 1,4-dioxane, concentrated sulfuric acid and ethyl acetate were obtained from commercial suppliers and used as received. Deionized water was used throughout the experimental procedures.

### Preparation of ligand (H<sub>3</sub>SPB).

Based on the literature method, the sulfonic acid-substituted 1,3,5-triphenylbenzene ligand (H<sub>3</sub>SPB) was synthesized using an improved protocol. Concentrated sulfuric acid (ca. 98%, 15 mL) was added to 1,3,5-triphenylbenzene (5 g), and the mixture was heated at 110 °C for 16 h under a nitrogen atmosphere. The hot mixture was then poured into deionized water (100 mL). The product was washed with an excess of ethyl acetate, followed by filtration and drying.<sup>1</sup>

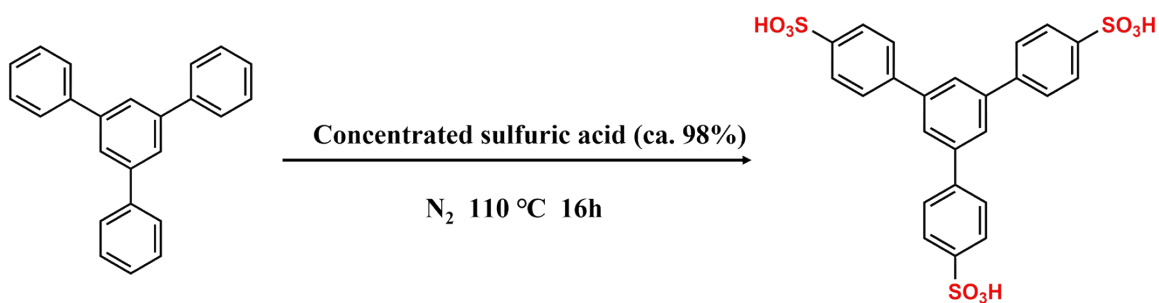

**Scheme S1.** Schematic representation for preparation of compound H<sub>3</sub>SPB.

## Preparation of iHOF-71.

TPA (2.5 mg, 0.010 mmol) was dissolved in 2 mL of H<sub>2</sub>O, followed by the addition of 15  $\mu$ L of 1 mol/L HCl solution to achieve complete dissolution. Separately, H<sub>3</sub>SPB (5.5 mg, 0.010 mmol) was dissolved in 2 mL of 1,4-dioxane to give a clear solution, to which 15  $\mu$ L of 1 mol/L HCl solution was added under stirring to ensure homogeneous dispersion. The two solutions were then thoroughly combined and allowed to stand at room temperature. The vessel was covered with plastic film pierced with small holes for slow solvent evaporation. Colorless transparent rod-shaped crystals were obtained after 1 day.

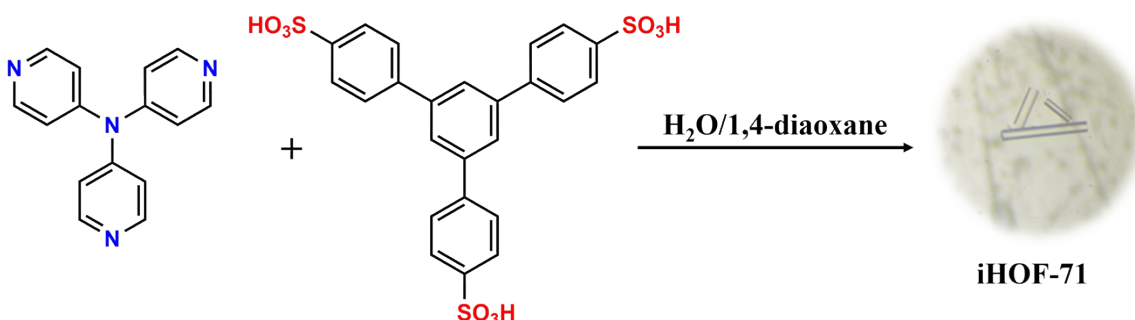

**Scheme S2.** Schematic representation for preparation of compound **iHOF-71**. (The inset on the right shows a microscope image.)

## Preparation of 5%- iHOF-71@PVA composite membrane.

10 wt % PVA (2 g) was added to 2 mL of water and stirred for 15 min to form a well-dispersed mixture. Separately, **iHOF-71** (10 mg) was thoroughly ground and then dispersed in 2 mL of water under stirring for 6 h

to obtain a uniform suspension. The two mixtures were combined and stirred continuously at room temperature for 6 h, resulting in a homogeneous solution. The resulting mixture was cast into a glass mold and dried in an oven at 70 °C for 5 h to remove the solvent, resulting in a **5%-iHOF-71@PVA** composite membrane.<sup>2</sup>

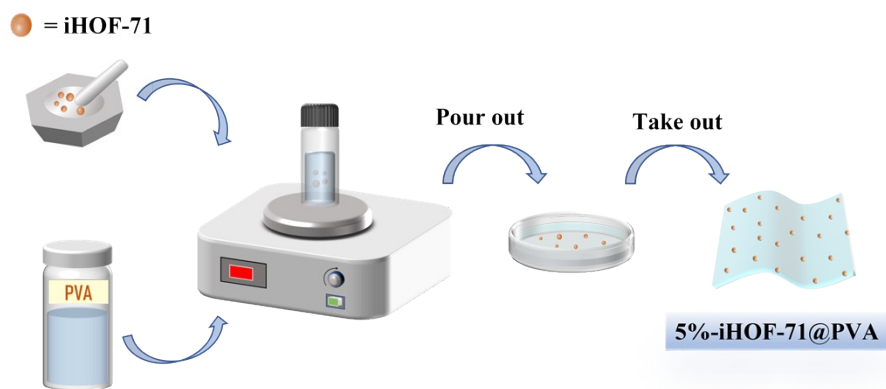

**Figure S1.** The **5%-iHOF-71@PVA** composite membrane production process.

### **Characterization.**

The Powder X-ray diffraction (PXRD) measurements were carried out in Bruker D8 Advance with a Cu X-ray source over a range of  $2\theta = 5.0-50.0^\circ$ . Fourier transform infrared (FT-IR) spectra were recorded on a Vector-22 spectrometer in the range of  $4000-400\text{ cm}^{-1}$  using potassium bromide pellets. Solid-state UV-vis spectra were recorded on an Agilent Cary 5000 spectrophotometer. Optical properties were tested on a FLS1000 steady-state transient fluorescence spectrometer in Edinburgh.  $^1\text{H}$  NMR spectra were

recorded on a Bruker 400 MHz spectrometer, with chemical shifts reported in ppm. Thermogravimetric analysis (TGA) was performed on TGA-55 under a nitrogen atmosphere at a heating rate of 10 °C/min over a temperature range of 30 to 600 °C. X-ray photoelectron spectroscopy (XPS) measurements were performed on a Thermo Fisher Nexsa spectrometer, with the binding energy scale calibrated using the C 1s peak at 284.8 eV as an internal reference. The solid-state EPR spectra were recorded at ambient temperature with a Bruker A300 Electron Spin Resonance Spectrometer.

### **Single-Crystal X-ray Diffraction.**

Single-crystal X-ray diffraction data for compound **iHOF-71** was collected on a Bruker D8 Venture three-circle diffractometer equipped with a Bruker PHOTON-II area detector and graphite-monochromated Mo-K $\alpha$  radiation ( $\lambda = 0.71073$  Å) using  $\varphi$ -scan and  $\omega$ -scan. Data processing was performed using the SAINT program, with Lorentz and polarization corrections applied. Absorption corrections were implemented via the SADABS program.<sup>3</sup> The structure was solved with direct methods (SHELXS) and refined by full-matrix least squares on  $F^2$  using OLEX2, which utilizes the SHELXL-2019/3 module.<sup>4,5</sup> All non-hydrogen atoms were refined anisotropically. Displacement parameter restraints were used in modeling the ligands. Hydrogen atoms were placed geometrically on their riding atom where

possible. 93 water molecules are included in the unit cell as solvent. Crystal data containing space group, lattice parameters and other relevant information for the title complex are summarized in Table S1. More details on the crystallographic data are given in the X-ray crystallographic files in CIF format. Complete structural data have been deposited with the Cambridge Crystallographic Data Centre under reference number CCDC 2488490 for **iHOF-71**.

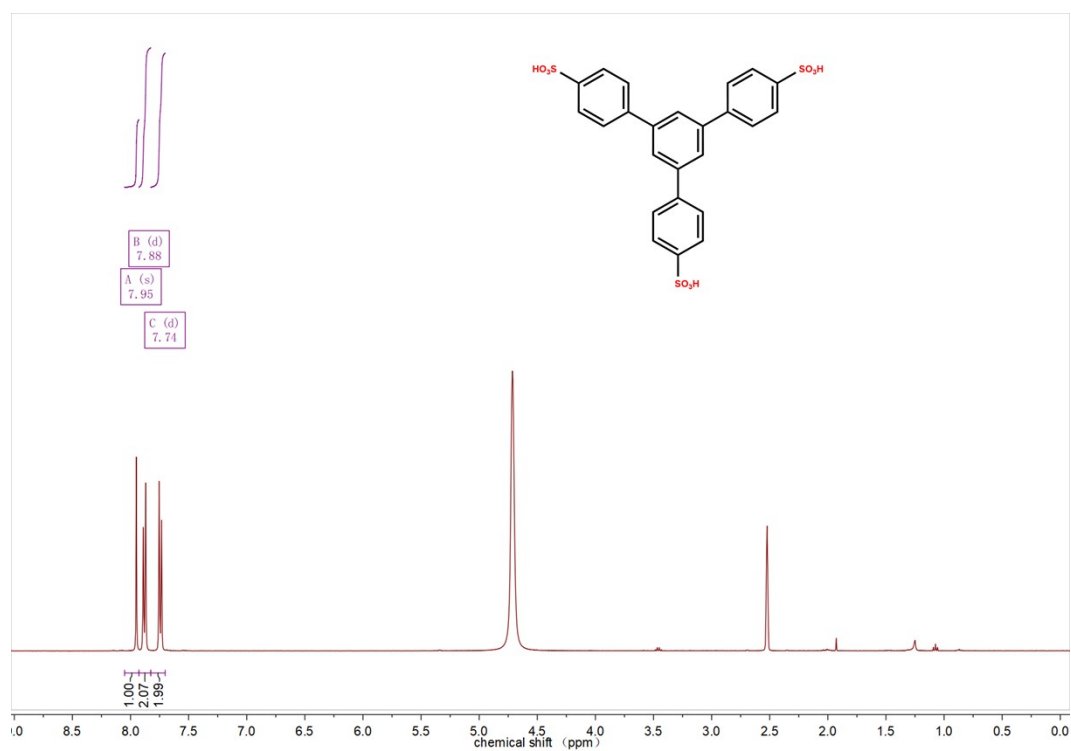

**Figure S2.** <sup>1</sup>H NMR synthesized by H<sub>3</sub>SPB.

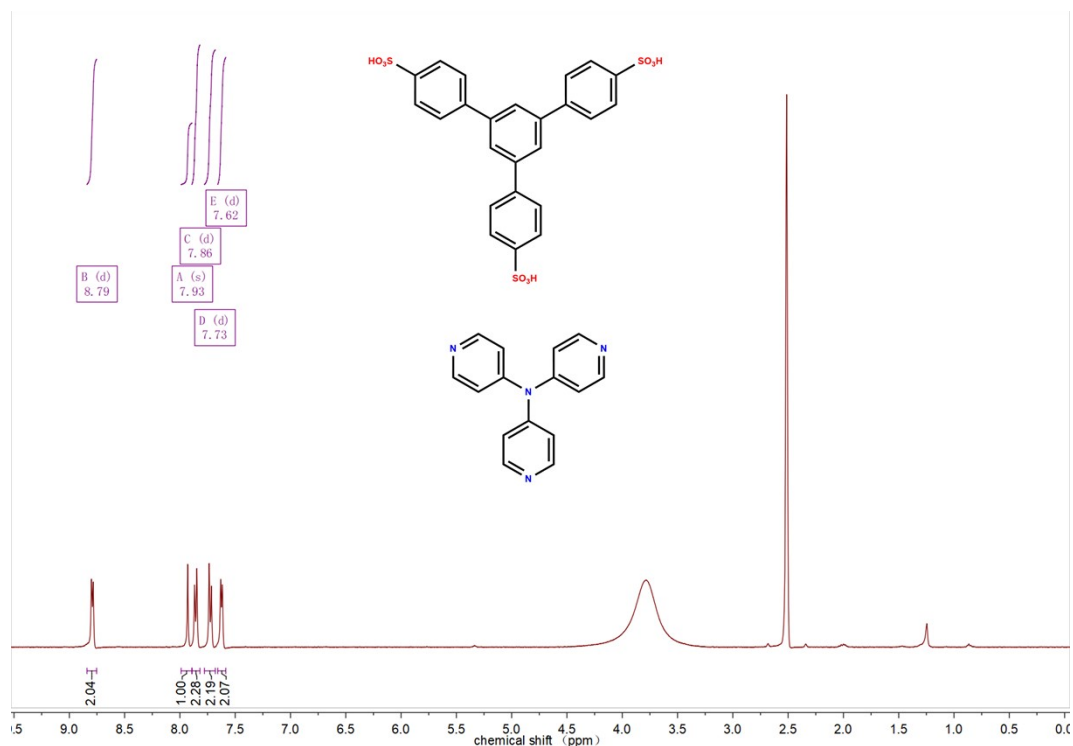

**Figure S3.**  $^1\text{H}$  NMR spectrum of iHOF-71.

## Computational Details

All density functional theory (DFT) calculations were performed using the CP2K 2025.2 software package within the Gaussian and plane waves (GPW) framework. The exchange-correlation interactions were described by the Perdew–Burke–Ernzerhof (PBE) functional, augmented with Grimme’s D3 dispersion correction with Becke–Johnson damping. For geometry optimizations, the valence electrons were described by the DZVP-MOLOPT-SR-GTH basis set, while the core electrons were represented by the GTH-PBE pseudopotentials. The energy cutoff and the relative cutoff were set to 600 Ry and 55 Ry, respectively. The Brillouin zone integration was restricted to the  $\Gamma$ -point. Time-dependent DFT (TD-DFT) calculations were subsequently conducted employing the same functional, but the TZVP-MOLOPT-SR-GTH basis set alongside GTH-SOC-PBE pseudopotentials. The lowest 50 singlet and 50 triplet excited states were computed. Furthermore, the spin-orbit coupling (SOC) matrix elements among the lowest 20 excited states were evaluated.

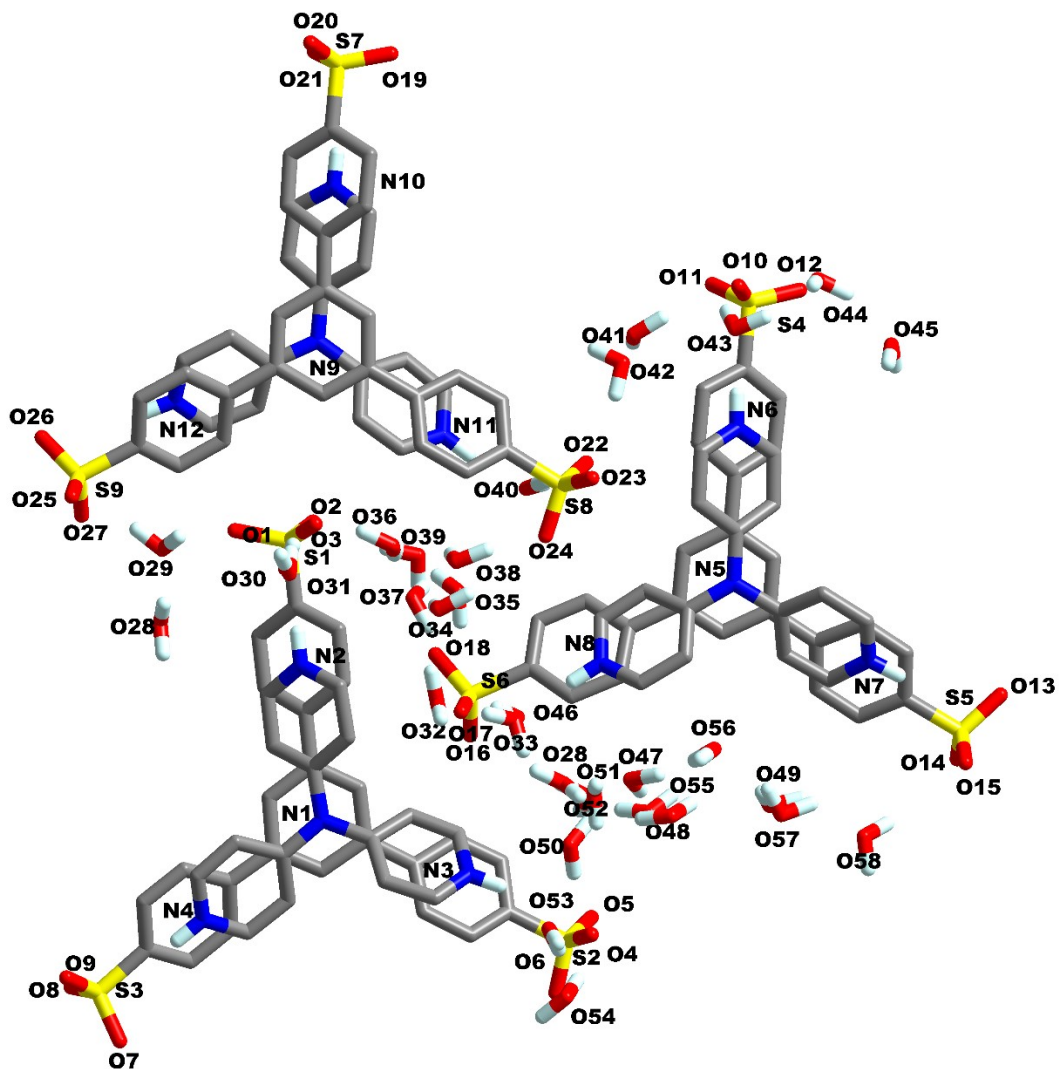

**Figure S4.** The asymmetric unit of **iHOF-71**. (The H atoms on the structural units have been omitted for clarity. The asymmetric unit contains 31 solvent water molecules. O (1-58): red; N (1-12): blue; S (1-9): yellow.)

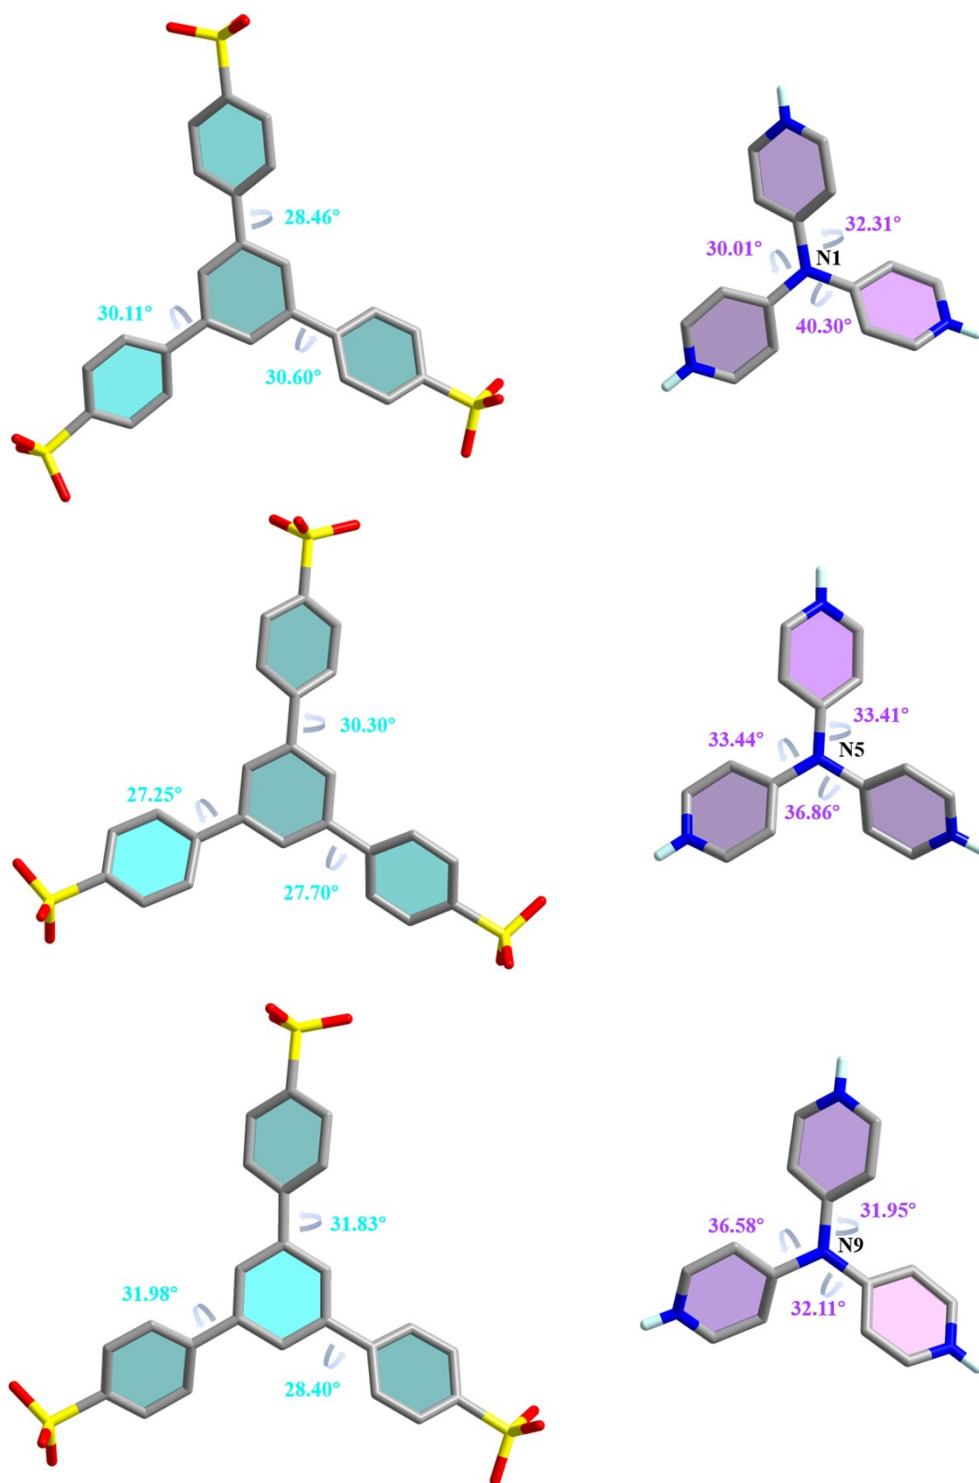

**Figure S5.** The torsion angles of the molecule in the asymmetric unit of iHOF-71.

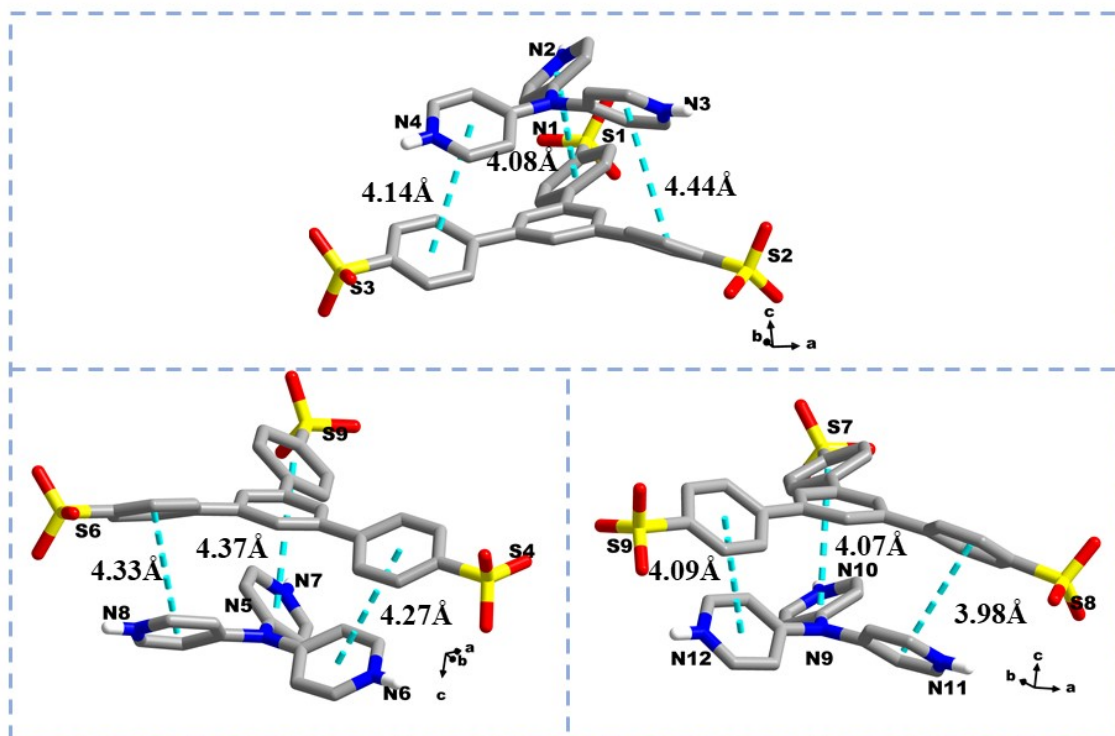

**Figure S6.**  $\pi$ - $\pi$  stacking in iHOF-71.

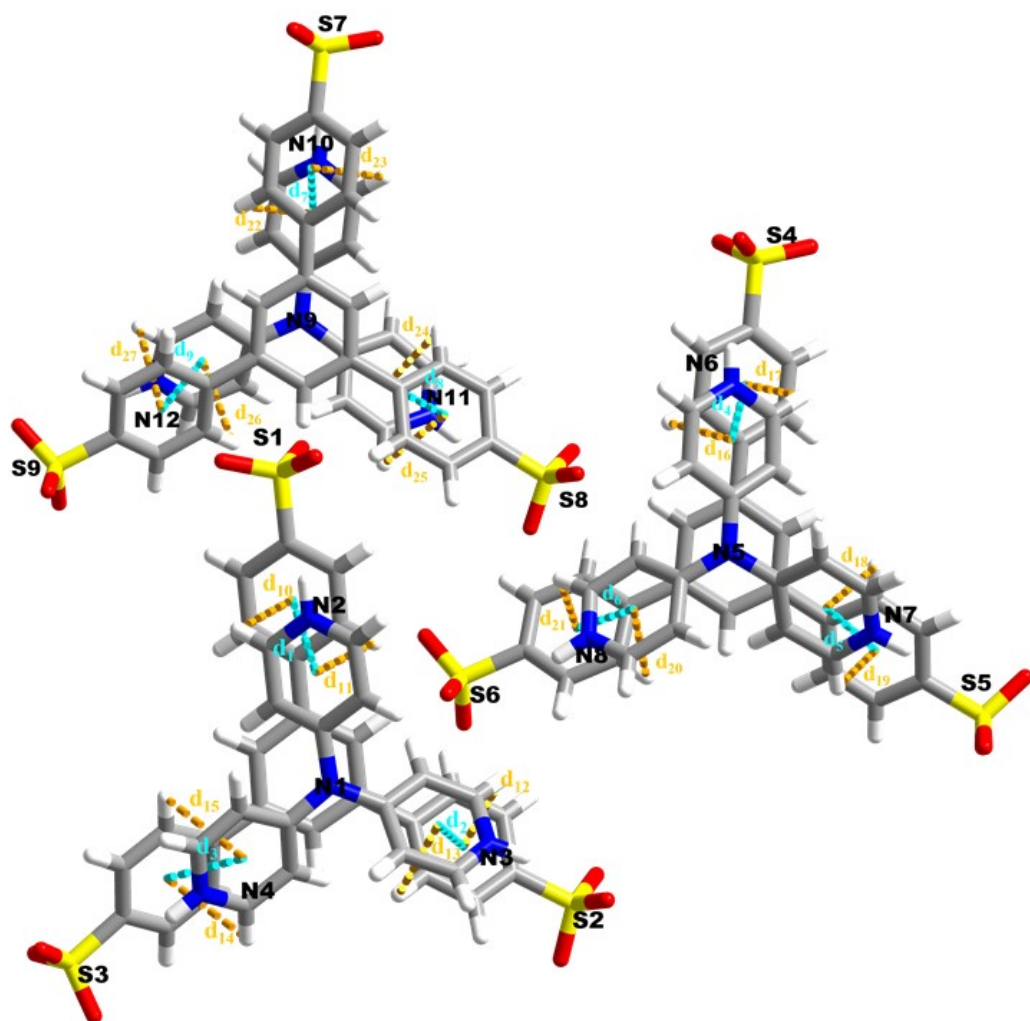

$\pi \cdots \pi$

$C-H \cdots \pi$

|                      |                         |                         |                         |
|----------------------|-------------------------|-------------------------|-------------------------|
| $d_1=3.21\text{\AA}$ | $d_{10}=3.22\text{\AA}$ | $d_{16}=3.47\text{\AA}$ | $d_{22}=3.09\text{\AA}$ |
| $d_2=4.44\text{\AA}$ | $d_{11}=3.48\text{\AA}$ | $d_{17}=3.33\text{\AA}$ | $d_{23}=3.09\text{\AA}$ |
| $d_3=4.14\text{\AA}$ | $d_{12}=3.56\text{\AA}$ | $d_{18}=3.38\text{\AA}$ | $d_{24}=3.09\text{\AA}$ |
| $d_4=4.27\text{\AA}$ | $d_{13}=3.67\text{\AA}$ | $d_{19}=3.15\text{\AA}$ | $d_{25}=3.09\text{\AA}$ |
| $d_5=4.35\text{\AA}$ | $d_{14}=3.44\text{\AA}$ | $d_{20}=3.51\text{\AA}$ | $d_{26}=3.09\text{\AA}$ |
| $d_6=4.32\text{\AA}$ | $d_{15}=3.42\text{\AA}$ | $d_{21}=3.09\text{\AA}$ | $d_{27}=3.09\text{\AA}$ |
| $d_7=4.07\text{\AA}$ |                         |                         |                         |
| $d_8=3.96\text{\AA}$ |                         |                         |                         |
| $d_9=4.09\text{\AA}$ |                         |                         |                         |

**Figure S7.** Schematic diagram of intermolecular interactions in iHOF-71.

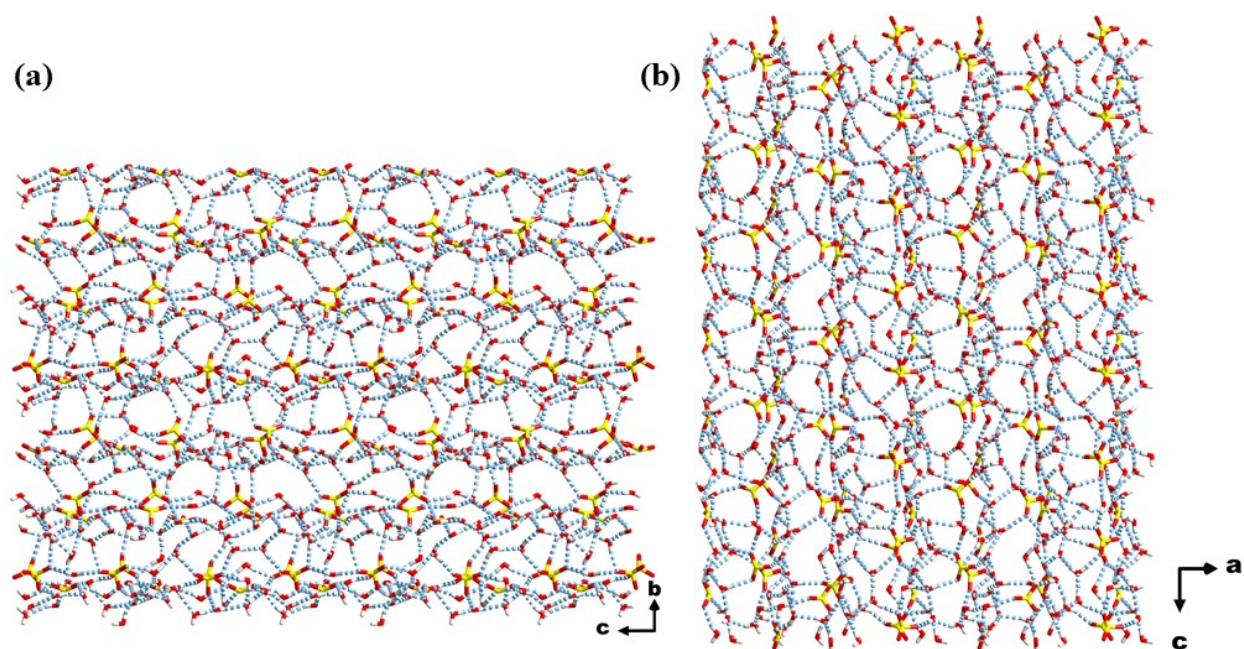

**Figure S8.** Hydrogen-bonded network structure of iHOF-71 along the (a) *a*-axis and (b) *b*-axis directions.

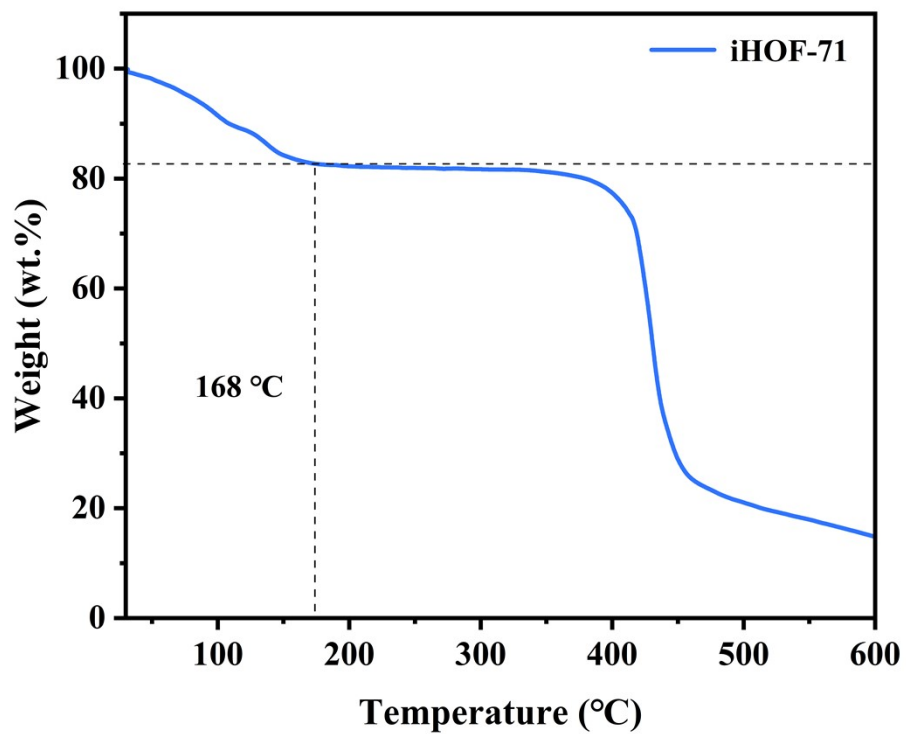

**Figure S9.** TGA plot of iHOF-71.

To evaluate the stability of **iHOF-71**, thermogravimetric analysis (TGA) was performed. The TGA curve reveals that the thermal decomposition of the material proceeds through two distinct weight-loss stages. The mass loss observed between room temperature and 168 °C corresponds to the loss of solvent water molecules. Following the plateau region between 168 °C and 360 °C, the collapse of the framework leads to destruction of the molecular structure, resulting in further mass loss.

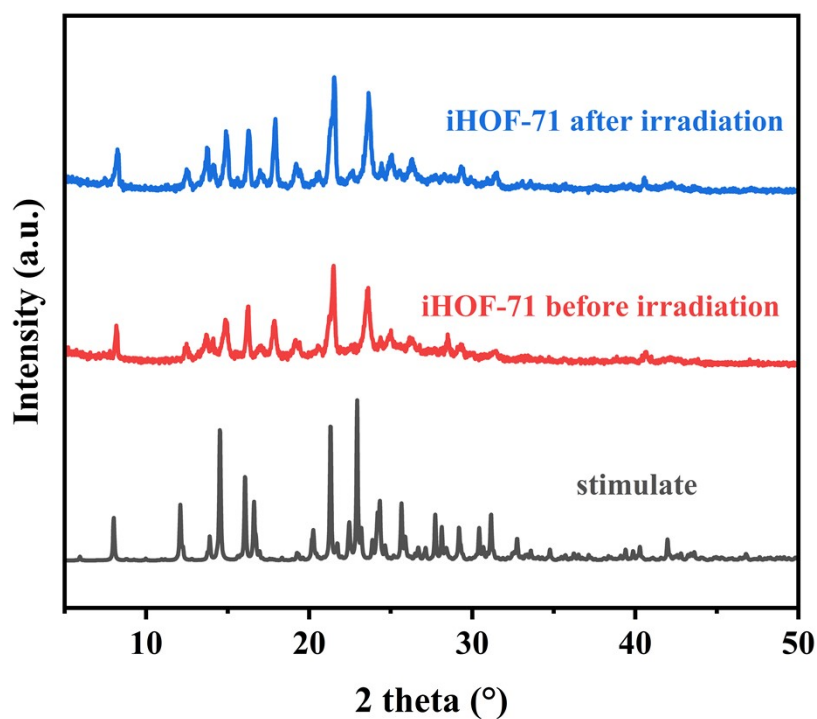

**Figure S10.** PXRD patterns of **iHOF-71**.

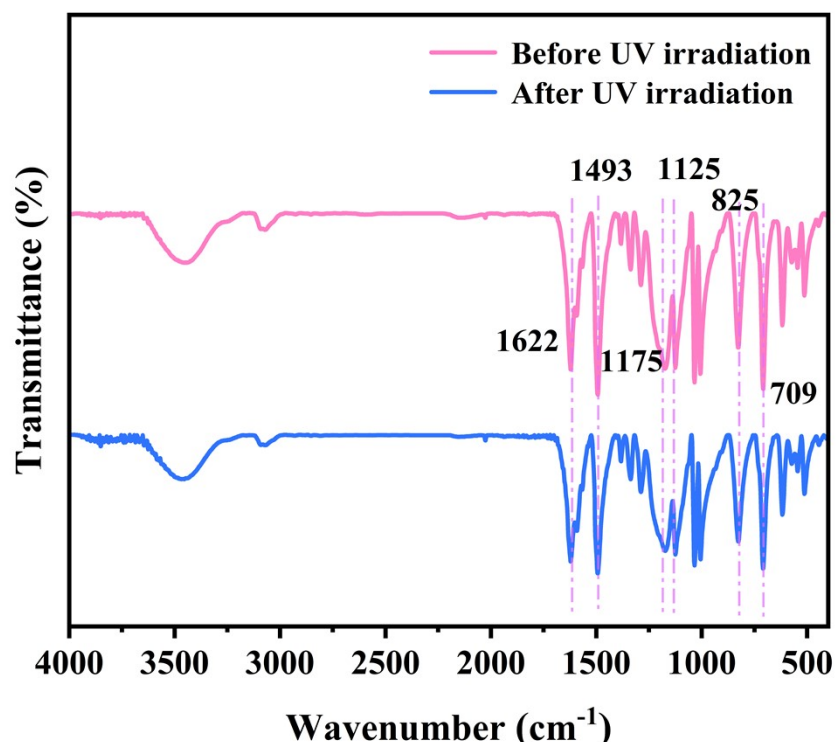

**Figure S11.** FT-IR spectra of iHOF-71.

The FT-IR spectra confirm the structural features of the framework: a broad band at 3650-3270  $\text{cm}^{-1}$  corresponds to O–H stretching from crystalline water and hydrogen bond network, while the peak at 1622  $\text{cm}^{-1}$  arises from H–O–H bending. The aromatic skeleton is indicated by a strong absorption at 1493  $\text{cm}^{-1}$  (C=C/C=N<sup>+</sup> stretching). Peaks at 1175 and 1125  $\text{cm}^{-1}$  are attributed to asymmetric stretching of  $-\text{SO}_3^-$  groups, and those at 825  $\text{cm}^{-1}$  and 709  $\text{cm}^{-1}$  correspond to out-of-plane C–H bending of 1,3,5-trisubstituted and monosubstituted benzene rings, respectively. Together, these spectroscopic features confirm the formation of a rigid three-dimensional iHOF.

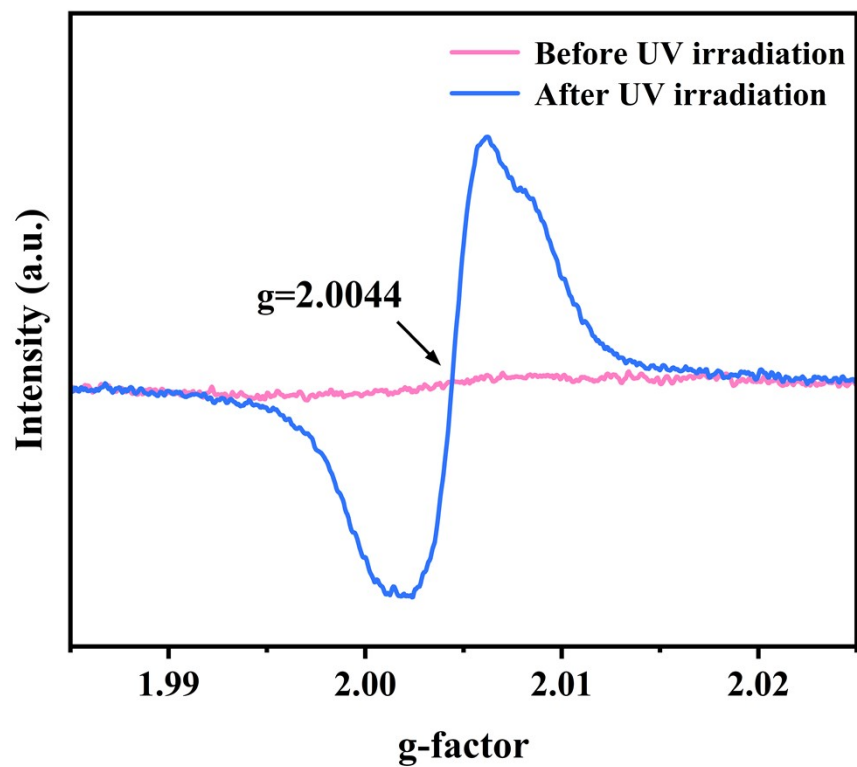

**Figure S12.** EPR spectra of iHOF-71.

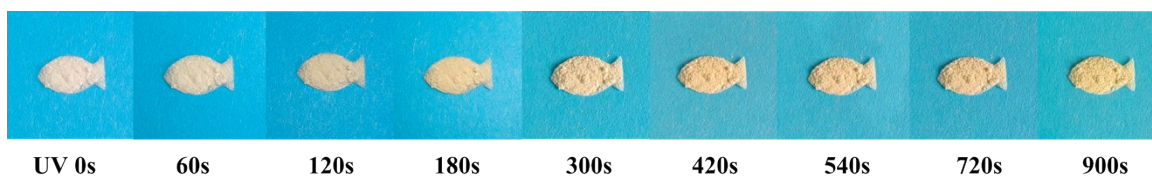

**Figure S13.** Photochromic photographs of iHOF-71 powder.

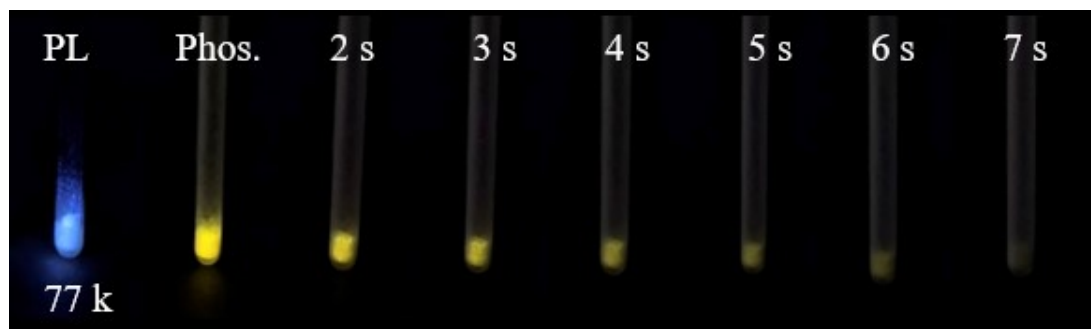

**Figure S14.** Photographs showing the time-dependent decay of fluorescence and afterglow for iHOF-71 at 77 K.

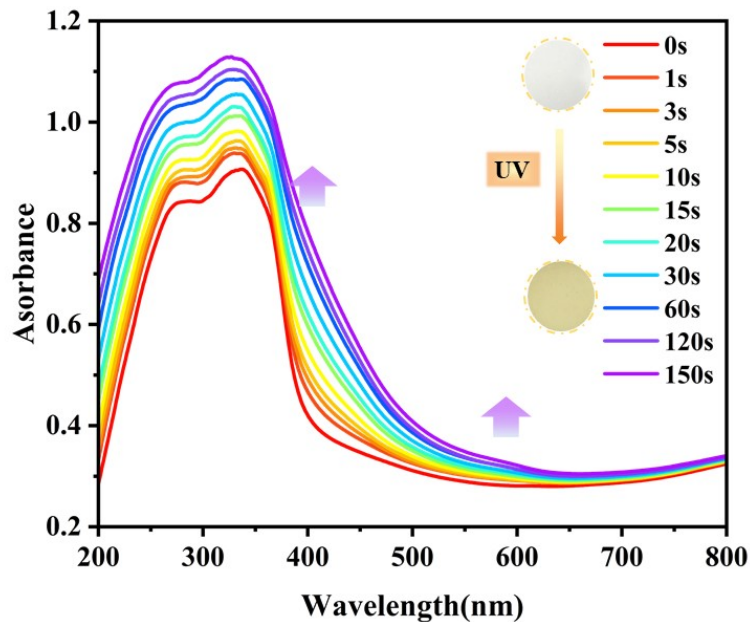

**Figure S15.** Solid UV-vis absorption spectra of iHOF-71 before and after 365 nm UV irradiation.

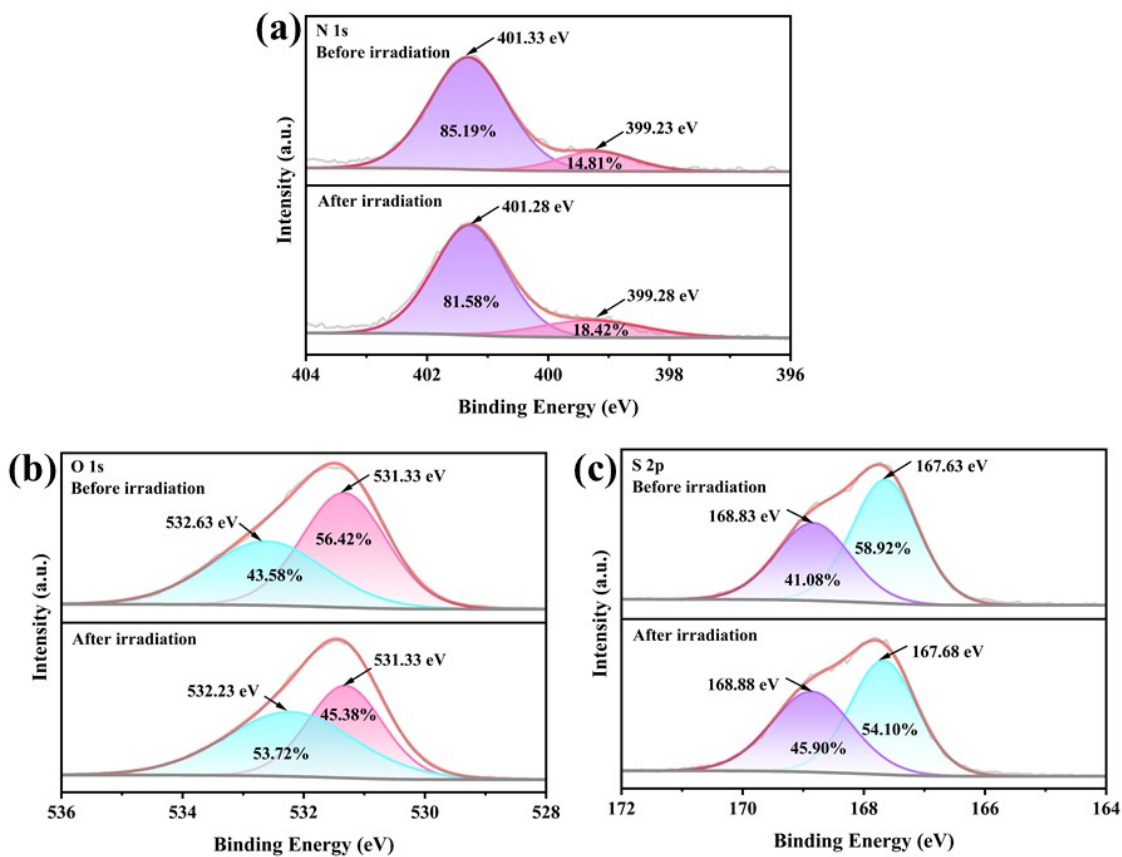

**Figure S16.** XPS spectra of iHOF-71 before and after 365 nm UV irradiation: (a) N 1s, (b) O 1s, and (c) S 2p.

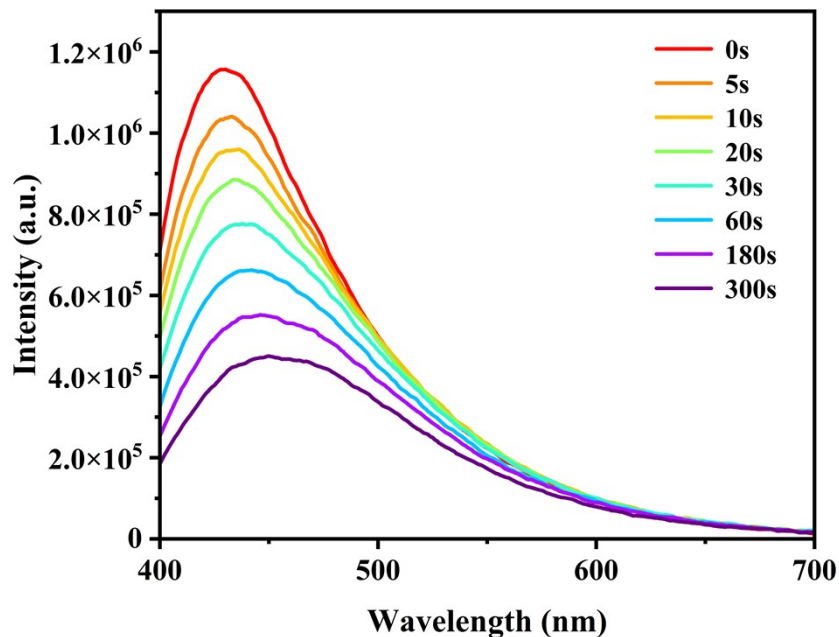

**Figure S17.** Fluorescence spectra of iHOF-71 under UV irradiation ( $\lambda_{ex}=365$  nm).

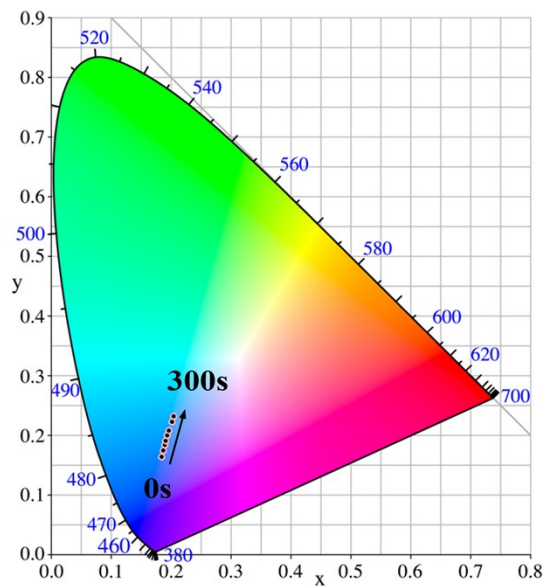

**Figure S18.** Corresponding CIE chromaticity diagram of the fluorescence decay curves for iHOF-71.

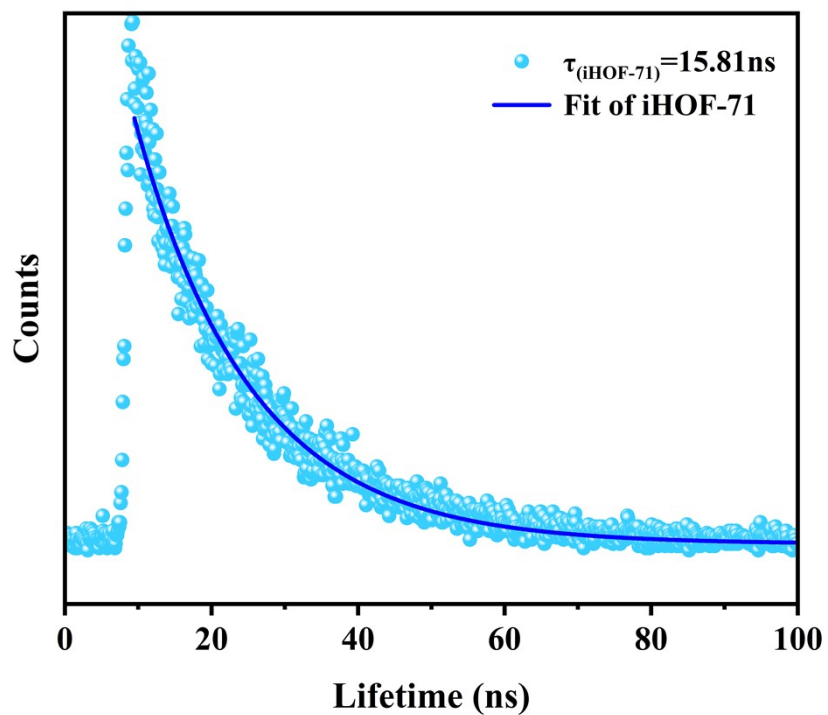

**Figure S19.** The fluorescence lifetime of iHOF-71.

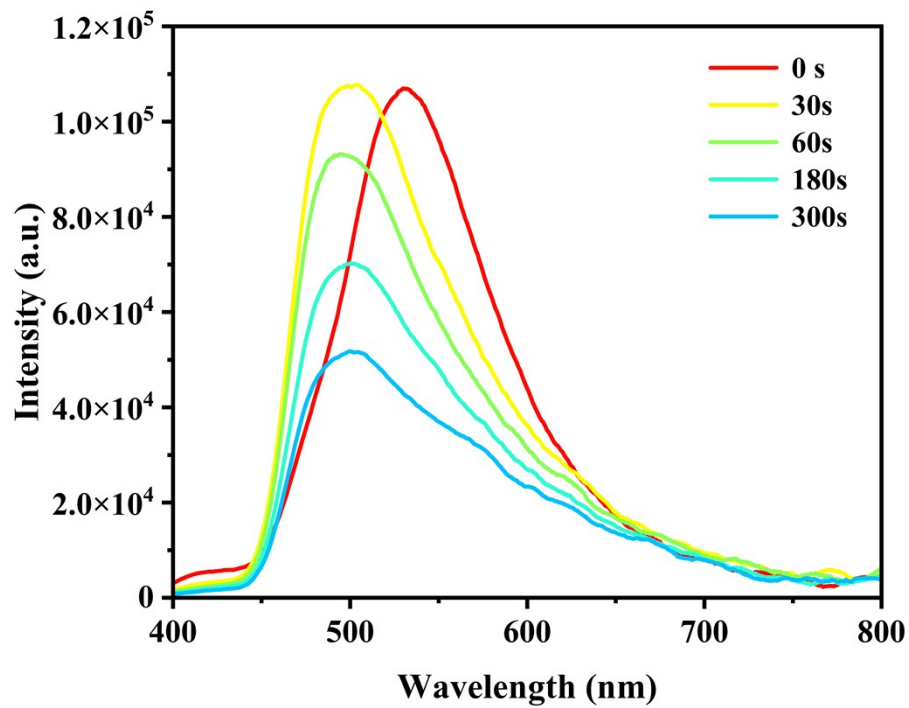

**Figure S20.** Time-dependent phosphorescence spectra of iHOF-71 under UV irradiation ( $\lambda_{\text{ex}} = 365 \text{ nm}$ ).

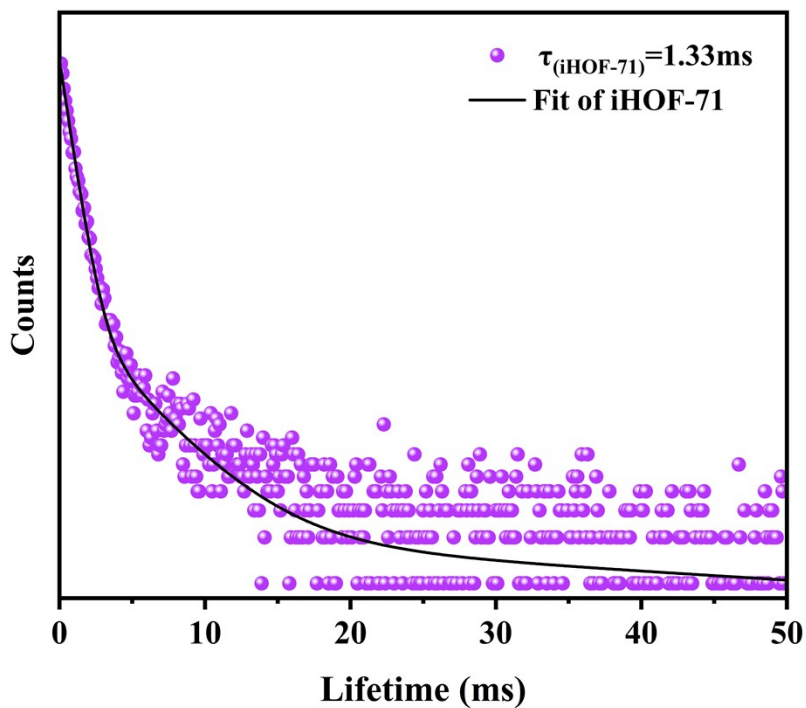

**Figure S21.** The phosphorescence lifetime of iHOF-71.

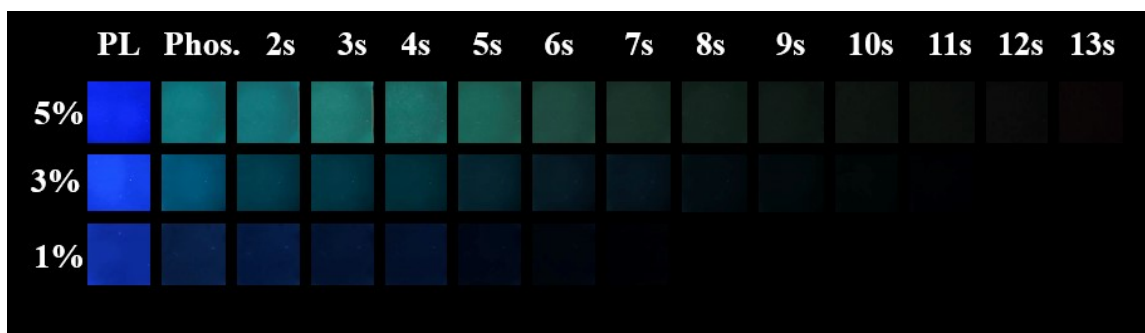

**Figure S22.** Fluorescence and phosphorescence decay images of the 1%, 3% and 5%-iHOF-71@PVA composite membranes.

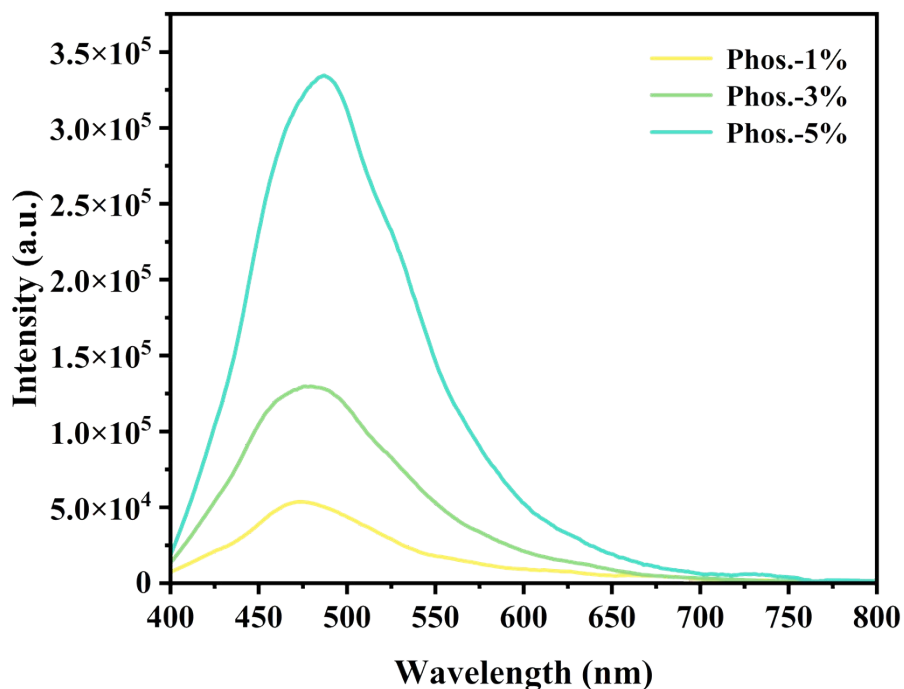

**Figure S23.** Phosphorescence spectra of **iHOF-71@PVA** composite membranes with different doping concentrations (1%, 3% and 5%) ( $\lambda_{\text{ex}}=365$  nm).

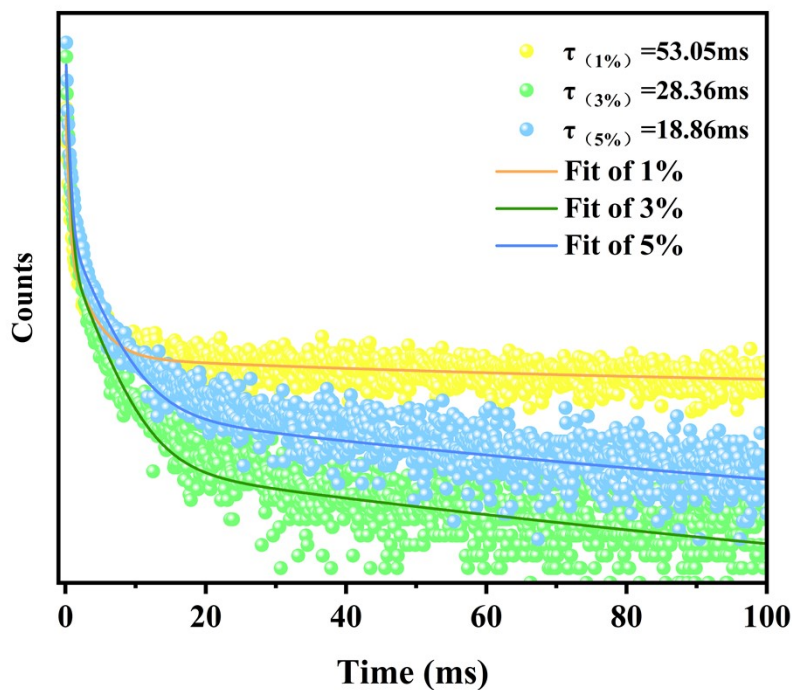

**Figure S24.** Phosphorescence lifetime of **iHOF-71@PVA** composite membranes with different doping concentrations (1%, 3% and 5%).

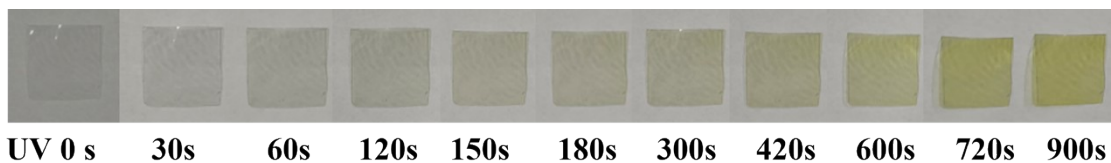

**Figure S25.** Photographs showing the color change of the **5%-iHOF-71@PVA** composite membrane under UV irradiation for different durations.

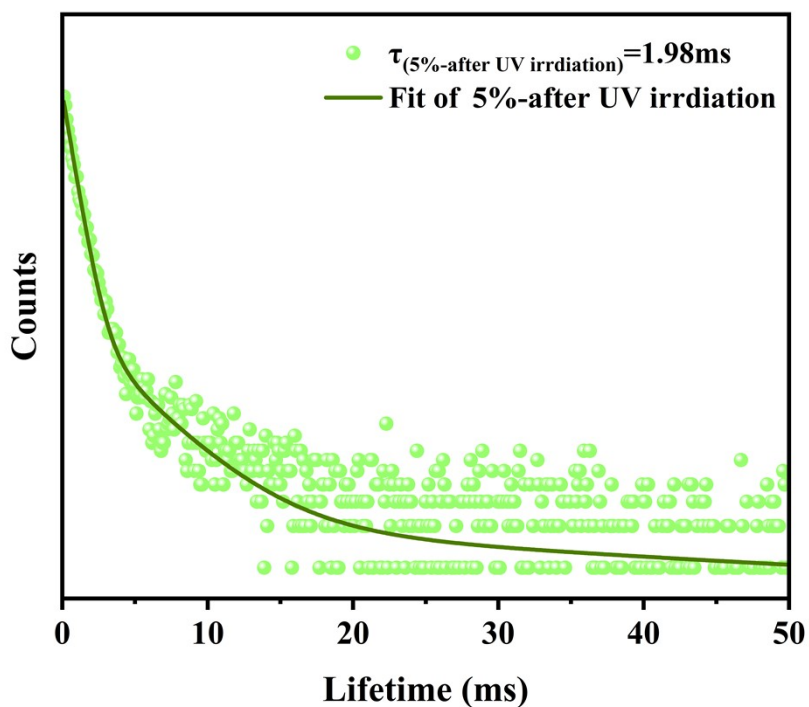

**Figure S26.** The phosphorescence lifetime of the **5%-iHOF-71@PVA** composite membrane after UV irradiation.

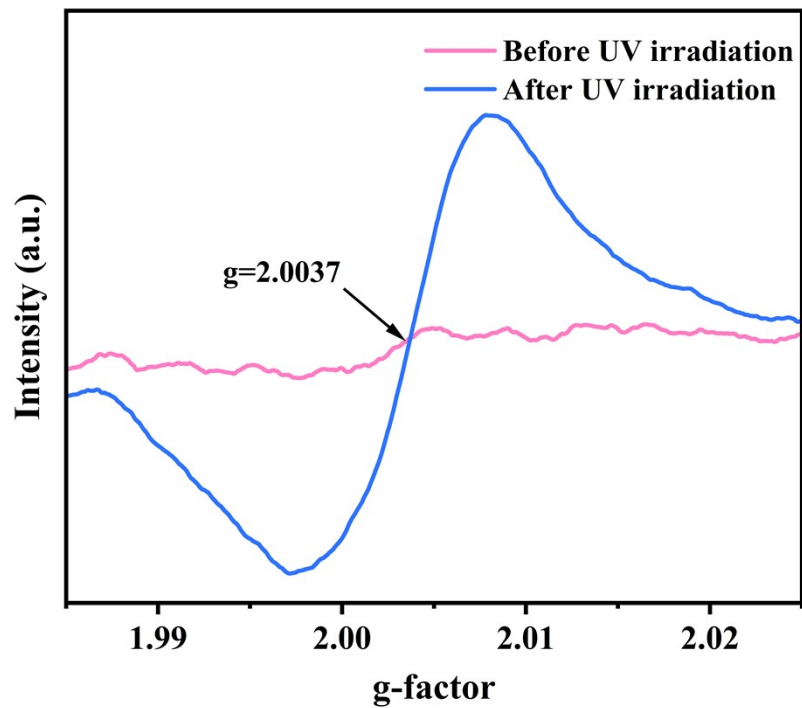

**Figure 27.** EPR spectra of the 5%-iHOF-71@PVA composite membrane before and after UV (365 nm) irradiation.

**Table S1.** Crystal structure data and refinement details of **iHOF-71**.

| <b>iHOF-71</b>                                   |                                                                |
|--------------------------------------------------|----------------------------------------------------------------|
| Empirical formula                                | $C_{351}H_{456}N_{36}O_{174}S_{27}$                            |
| Formula weight                                   | 8829.11                                                        |
| Temperature / K                                  | 193.15(10)                                                     |
| Crystal system                                   | trigonal                                                       |
| Space group                                      | $P3_2$                                                         |
| a/Å                                              | 22.0448(9)                                                     |
| b/Å                                              | 22.0448(9)                                                     |
| c/Å                                              | 23.7361(13)                                                    |
| $\alpha/^\circ$                                  | 90                                                             |
| $\beta/^\circ$                                   | 90                                                             |
| $\gamma/^\circ$                                  | 120                                                            |
| Volume/Å <sup>3</sup>                            | 9989.7(10)                                                     |
| Z                                                | 1                                                              |
| $\rho_{\text{calc}} \text{ g/cm}^3$              | 1.468                                                          |
| $\mu/\text{mm}^{-1}$                             | 0.251                                                          |
| F (000)                                          | 4638.0                                                         |
| Radiation                                        | Mo K $\alpha$ ( $\lambda = 0.71073$ )                          |
| 2 $\theta$ range for data collection/ $^\circ$   | 3.696 to 55.096                                                |
| Index ranges                                     | $-28 \leq h \leq 28, -28 \leq k \leq 28, -30 \leq l \leq 23$   |
| Reflections collected                            | 93865                                                          |
| Independent reflections                          | 27399 [ $R_{\text{int}} = 0.0984, R_{\text{sigma}} = 0.1021$ ] |
| Data/restraints/parameters                       | 27399/310/1870                                                 |
| Goodness-of-fit on $F^2$                         | 1.085                                                          |
| Final R indexes [ $I \geq 2\sigma(I)$ ]          | $R_1 = 0.1154, wR_2 = 0.2695$                                  |
| Final R indexes [all data]                       | $R_1 = 0.1574, wR_2 = 0.2951$                                  |
| Largest diff. peak and hole / e. Å <sup>-3</sup> | 0.83/-0.58                                                     |
| CCDC number                                      | 2488490                                                        |

$${}^a R_1 = \sum ||F_o| - |F_c|| / \sum |F_o|. {}^b wR_2 = \{ \sum [w(F_o^2 - F_c^2)^2] / \sum [w(F_o^2)^2] \}^{1/2}$$

**Table S2.** Detailed data of iHOF-71 hydrogen bonds.

|        |          | H       | Y / Å    |          |        |
|--------|----------|---------|----------|----------|--------|
| S1-O1  | H52A-O52 | 2.033 Å | S8-O22   | H42A-O42 | 1.991  |
| S1-O2  | H30A-O30 | 1.974 Å | S8-O24   | H38A-O38 | 2.058  |
| S1-O3  | H39B-O39 | 2.106   | S9-O26   | H45B-O45 | 2.128  |
| S1-O3  | H53B-O53 | 2.017   | S9-O27   | H39A-O39 | 1.885  |
| S2-O4  | H50B-O50 | 2.050   | O40-H40A | O25-S9   | 1.895  |
| S2-O4  | H54B-O54 | 1.864   | O42-H42B | O7-S3    | 2.057  |
| S2-O5  | H31A-O31 | 1.887   | S4-O10   | H43A-O43 | 1.937  |
| S2-O6  | H58B-O58 | 1.948   | S4-O11   | H28A-O28 | 1.908  |
| S3-O7  | H29B-O29 | 2.059   | S4-O11   | H32B-O32 | 2.0898 |
| S3-O7  | H42B-O42 | 2.057   | S4-O12   | H58A-O58 | 1.981  |
| S3-O8  | H30B-O30 | 2.164   | S5-O13   | H51B-O51 | 1.948  |
| S3-O8  | H36A-O36 | 1.972   | S5-O14   | H37B-O37 | 1.966  |
| S3-O9  | H31B-O31 | 2.039   | S5-O14   | H46B-O46 | 1.866  |
| S6-O16 | H41A-O41 | 2.137   | S5-O15   | H35B-O35 | 2.075  |
| S6-O17 | H46A-O46 | 1.897   | S7-O20   | H55B-O55 | 2.000  |
| S6-O18 | H39A-O39 | 1.967   | S8-O23   | H48A-O48 | 2.043  |
| S6-O18 | H44A-O44 | 2.012   | S9-O25   | H29A-O29 | 2.035  |
| S7-O19 | H34B-O34 | 2.045   | S9-O25   | H40A-O40 | 1.895  |
| S7-O21 | H47A-O47 | 1.991   | O30      | H2-N2    | 1.752  |
| S7-O14 | H49B-O49 | 1.961   | O40      | H11-N11  | 1.786  |

|                 |                 |              |                 |                 |              |
|-----------------|-----------------|--------------|-----------------|-----------------|--------------|
| <b>S8-O22</b>   | <b>H40B-O40</b> | <b>1.930</b> | <b>O53</b>      | <b>H3-N3</b>    | <b>1.820</b> |
| <b>N4-H4</b>    | <b>O31</b>      | <b>1.794</b> | <b>O28-H28B</b> | <b>O29</b>      | <b>1.843</b> |
| <b>N12-H12</b>  | <b>O57</b>      | <b>1.747</b> | <b>O32</b>      | <b>H33A-O33</b> | <b>1.701</b> |
| <b>N10-H10</b>  | <b>O49</b>      | <b>1.811</b> | <b>O32-H32A</b> | <b>O34</b>      | <b>1.788</b> |
| <b>O33</b>      | <b>H7A-N7</b>   | <b>1.760</b> | <b>O33-H33B</b> | <b>O52</b>      | <b>2.204</b> |
| <b>O43</b>      | <b>H6-N6</b>    | <b>1.763</b> | <b>O35</b>      | <b>H49A-O49</b> | <b>1.981</b> |
| <b>O46</b>      | <b>H8A-N8</b>   | <b>1.775</b> | <b>O35</b>      | <b>H34A-O34</b> | <b>2.083</b> |
| <b>O28</b>      | <b>H52B-O52</b> | <b>2.126</b> | <b>O35-H35A</b> | <b>O36</b>      | <b>1.784</b> |
| <b>O37-H37A</b> | <b>O38</b>      | <b>1.841</b> | <b>O36-H36B</b> | <b>O37</b>      | <b>1.962</b> |
| <b>O38-H38B</b> | <b>O39</b>      | <b>2.015</b> | <b>O43-H43B</b> | <b>O44</b>      | <b>1.851</b> |
| <b>O41-H41B</b> | <b>O40</b>      | <b>2.012</b> | <b>O44-H44B</b> | <b>O45</b>      | <b>1.984</b> |
| <b>O47</b>      | <b>H50A-O50</b> | <b>1.909</b> | <b>O45-H45A</b> | <b>O57</b>      | <b>2.190</b> |
| <b>O47-H47B</b> | <b>O48</b>      | <b>1.915</b> | <b>O45-H45A</b> | <b>O58</b>      | <b>2.440</b> |
| <b>O48-H48B</b> | <b>O41</b>      | <b>2.081</b> | <b>O55</b>      | <b>H56A-O56</b> | <b>2.039</b> |
| <b>O50</b>      | <b>H51A-O50</b> | <b>1.857</b> | <b>O55-H55A</b> | <b>O51</b>      | <b>2.007</b> |
| <b>O53-H53A</b> | <b>O54</b>      | <b>1.805</b> | <b>O56</b>      | <b>H57B-O57</b> | <b>1.793</b> |
| <b>O54-H54A</b> | <b>O45</b>      | <b>2.106</b> | <b>O57-H57A</b> | <b>O58</b>      | <b>1.719</b> |

## Supplementary Reference

- (1) Y.-T. Li, M. Handke, Y.-S. Chen, A. G. Shtukenberg, C. H. T. Hu, and M. D. Ward. *J. Am. Chem. Soc.*, 2018, **140**, 12915-12921.
- (2) M.-F. Huang, L.-H. Cao and B. Zhou, *Chem. Commun.*, 2024, **60**, 3437-3440.
- (3) L. Krause, R. Herbst-Irmer, G. M. Sheldrick and D. Stalke, *J. Appl. Cryst.*, 2015, **48**, 3-10.
- (4) L. J. Bourhis, O. V. Dolomanov, R. J. Gildea, J. A. K. Howard and H. Puschmann, *Acta Cryst. A*, 2015, **71**, 59-75.
- (5) O. V. Dolomanov, L. J. Bourhis, R. J. Gildea, J. A. K. Howard and H. Puschmann, *J. Appl. Cryst.*, 2009, **42**, 339-341.
